# Supplementary material for: Concentration-Dependency and Time Profile of Insulin Secretion: Dynamic Perifusion Studies With Human and Murine Islets
Source: PubMed Central journal article supplement (PMC6783504; doi:10.3389/fendo.2019.00680), 2019-10-02
Supplement: Data_Sheet_1.pdf [file Data_Sheet_1.pdf]

*Supplementary Material*

**Concentration-Dependency and Time Profile of Insulin Secretion:  
Dynamic Perifusion Studies with Human and Murine Islets**

Oscar Alcazar<sup>1</sup> and Peter Buchwald<sup>1,2\*</sup>

<sup>1</sup>Diabetes Research Institute, University of Miami, Miller School of Medicine, Miami, FL, USA and

<sup>2</sup>Department of Molecular and Cellular Pharmacology, University of Miami, Miller School of  
Medicine, Miami, FL, USA

## 1.1 Supplementary Tables

**Table S1.** Calculated dynamic stimulation indices (dSIs) for the different high-glucose (HG) challenges explored in the present perfusion assay (compared to 3 mM G3 low-glucose baselines) for human and mouse islets. Values are those calculated for the average profiles at each glucose step shown in Figure 3; values below in smaller font indicate range for dSIs calculated for each individual perfused sample.

| <b>HG (vs. G3)</b> | <b>Human dSI</b>  | <b>Mouse dSI</b>    |
|--------------------|-------------------|---------------------|
| <b>G5</b>          | 1.6<br>(1.3–5.3)  | 1.2<br>(1.0–1.7)    |
| <b>G7</b>          | 3.9<br>(2.5–18.8) | 2.0<br>(1.1–3.0)    |
| <b>G9</b>          | 4.8<br>(2.7–27.4) | 3.1<br>(1.4–8.1)    |
| <b>G11</b>         | 7.1<br>(2.2–30.3) | 7.7<br>(1.9–16.2)   |
| <b>G16.7</b>       | 8.4<br>(2.7–29.5) | 12.9<br>(11.0–22.9) |
| <b>G30</b>         | 9.1<br>(2.8–41.5) | 20.8<br>(19.7–35.4) |

**Table S2.** Checklist for reporting human islet preparations used in research. Adapted from Hart NJ and Powers AC. *Diabetologia* (2019) 62:212. Data for islets preparations used for the concentration-response dynamic GSIS study (Figure 3A).

| Islet preparation                                                      | 1                 | 2           | 3       | 4       | 5       | 6       | 7       | 8 |
|------------------------------------------------------------------------|-------------------|-------------|---------|---------|---------|---------|---------|---|
| <b>Mandatory Information</b>                                           |                   |             |         |         |         |         |         |   |
| Unique identifier                                                      | HP-1819601        | HP-2287     | HP-2288 | HP-2290 | HP-2291 | HP-2293 | HP-2298 |   |
| Donor age (years)                                                      | 49                | 63          | 51      | 23      | 45      | 42      | 49      |   |
| Donor sex (M/F)                                                        | M                 | F           | F       | M       | F       | F       | M       |   |
| Donor BMI (kg/m <sup>2</sup> )                                         | 30.3              | 25.1        | 32.2    | 21.0    | 32.1    | 32.0    | 25.9    |   |
| Donor HbA <sub>1c</sub> or other measure of blood glucose control      | 5.8               | -           | -       | -       | -       | 5.8     | -       |   |
| Origin/source of islets                                                | IIDP              | DRI         | DRI     | DRI     | DRI     | DRI     | DRI     |   |
| Islet isolation center                                                 | Scharp-Lacy Inst. | DRI         | DRI     | DRI     | DRI     | DRI     | DRI     |   |
| Donor history of diabetes?<br>Please select yes/no from drop down list | No                | No          | No      | No      | No      | No      | No      |   |
| If Yes, complete the next two lines if this information is available   |                   |             |         |         |         |         |         |   |
| Diabetes duration (years)                                              | -                 | -           | -       | -       | -       | -       | -       |   |
| Glucose-lowering therapy at time of death                              | -                 | -           | -       | -       | -       | -       | -       |   |
| <b>Recommended Information</b>                                         |                   |             |         |         |         |         |         |   |
| Donor cause of death                                                   | Anoxia            | Head Trauma | Stroke  | CVA     | ICH     | CVA     | Stroke  |   |
| Cold ischemia time (h)                                                 | 11:09             | 10:09       | 14:31   | 14:10   | 14:10   | 10:46   | 14:38   |   |
| Estimated purity (%)                                                   | 85                | 90          | 90      | 90      | 80      | 90      | 90      |   |
| Estimated viability (%)                                                | 95                | 90          | 90      | 92      | 90      | 90      | 90      |   |
| Additional notes                                                       | -                 | -           | -       | -       | -       | -       | -       |   |

**Table S3.** Checklist for reporting human islet preparations used in research. Adapted from Hart NJ and Powers AC. *Diabetologia* (2019) 62:212. Data for islets preparations used for dynamic GSIS study (Figure 2A).

| Islet preparation                                                      | 1           | 2      | 3       | 4       | 5       | 6       | 7       | 8       |
|------------------------------------------------------------------------|-------------|--------|---------|---------|---------|---------|---------|---------|
| <b>Mandatory Information</b>                                           |             |        |         |         |         |         |         |         |
| Unique identifier                                                      | IIDP4       | IIDP5  | HP-2221 | HP-2222 | HP-2224 | HP-2230 | HP-2231 | HP-2242 |
| Donor age (years)                                                      | 24          | 42     | 23      | 53      | 49      | 52      | 20      | 17      |
| Donor sex (M/F)                                                        | M           | M      | F       | F       | M       | F       | F       | F       |
| Donor BMI (kg/m <sup>2</sup> )                                         | 29.4        | 36.8   | 24.0    | 34.0    | 28.1    | 26.8    | 30.1    | 25.6    |
| Donor HbA <sub>1c</sub> or other measure of blood glucose control      | -           | -      | -       | 5.3     | 5.6     | 6.3     | 5.4     | 5.2     |
| Origin/source of islets                                                | IIDP        | IIDP   | DRI     | DRI     | DRI     | DRI     | DRI     | DRI     |
| Islet isolation center                                                 | DRI         | DRI    | DRI     | DRI     | DRI     | DRI     | DRI     | DRI     |
| Donor history of diabetes?<br>Please select yes/no from drop down list | No          | No     | No      | No      | No      | No      | No      | No      |
| If Yes, complete the next two lines if this information is available   |             |        |         |         |         |         |         |         |
| Diabetes duration (years)                                              | -           | -      | -       | -       | -       | -       | -       | -       |
| Glucose-lowering therapy at time of death                              | -           | -      | -       | -       | -       | -       | -       | -       |
| <b>Recommended Information</b>                                         |             |        |         |         |         |         |         |         |
| Donor cause of death                                                   | Head Trauma | Stroke | Stroke  | Stroke  | CVA     | CVA     | MVA     | MVA     |
| Cold ischemia time (h)                                                 | 19:37       | 15:28  | 21:43   | 12:47   | 13:33   | 12:48   | 10:14   | 15:50   |
| Estimated purity (%)                                                   | 85          | 95     | 90      | 90      | 80      | 90      | 70      | 80      |
| Estimated viability (%)                                                | 93          | 93     | 90      | 93      | 90      | 90      | 90      | 90      |
| Additional notes                                                       | -           | -      | -       | -       | -       | -       | -       | -       |

| <b>Islet preparation</b>                                               | <b>9</b> | <b>10</b> | <b>11</b>        | <b>12</b>   | <b>13</b> | <b>14</b> | <b>15</b> | <b>16</b> |
|------------------------------------------------------------------------|----------|-----------|------------------|-------------|-----------|-----------|-----------|-----------|
| <b>Mandatory Information</b>                                           |          |           |                  |             |           |           |           |           |
| Unique identifier                                                      | HP-2243  | HP-2246   | HP-2280          | HP-2287     | HP-2288   | HP-2290   | HP-2291   | HP-2293   |
| Donor age (years)                                                      | 39       | 59        | 45               | 63          | 51        | 23        | 45        | 42        |
| Donor sex (M/F)                                                        | F        | M         | M                | F           | F         | M         | F         | F         |
| Donor BMI (kg/m <sup>2</sup> )                                         | 24.8     | 34.1      | 24.6             | 25.1        | 32.2      | 21.0      | 32.1      | 32.0      |
| Donor HbA <sub>1c</sub> or other measure of blood glucose control      | -        | 5.7       | 5.0              | -           | 5.3       | -         | 5.5       | 5.8       |
| Origin/source of islets                                                | DRI      | DRI       | DRI              | DRI         | DRI       | DRI       | DRI       | DRI       |
| Islet isolation center                                                 | DRI      | DRI       | DRI              | DRI         | DRI       | DRI       | DRI       | DRI       |
| Donor history of diabetes?<br>Please select yes/no from drop down list | No       | No        | No               | No          | No        | No        | No        | No        |
| If Yes, complete the next two lines if this information is available   |          |           |                  |             |           |           |           |           |
| Diabetes duration (years)                                              | -        | -         | -                | -           | -         | -         | -         | -         |
| Glucose-lowering therapy at time of death                              | -        | -         | -                | -           | -         | -         | -         | -         |
| <b>Recommended Information</b>                                         |          |           |                  |             |           |           |           |           |
| Donor cause of death                                                   | CVA      | CVA       | Subdural Hygroma | Head Trauma | Stroke    | CVA       | ICH       | CVA       |
| Cold ischemia time (h)                                                 | 16:25    | 10:45     | 12:17            | 10:09       | 14:31     | 14:10     | 14:10     | 10:46     |
| Estimated purity (%)                                                   | 95       | 90        | 90               | 90          | 90        | 90        | 80        | 90        |
| Estimated viability (%)                                                | 93       | 90        | 90               | 90          | 90        | 92        | 90        | 90        |
| Additional notes                                                       | -        | -         | -                | -           | -         | -         | -         | -         |

| <b>Islet preparation</b>                                             | <b>17</b> | <b>18</b>         | <b>19</b>       | <b>20</b>       | <b>21</b>       | <b>22</b> | <b>23</b> | <b>24</b> |
|----------------------------------------------------------------------|-----------|-------------------|-----------------|-----------------|-----------------|-----------|-----------|-----------|
| <b>Mandatory Information</b>                                         |           |                   |                 |                 |                 |           |           |           |
| Unique identifier                                                    | HP-2298   | HP-1819601        | 10079665        | 10252228        | 10374868        |           |           |           |
| Donor age (years)                                                    | 49        | 49                | 25              | 55              | 58              |           |           |           |
| Donor sex (M/F)                                                      | M         | M                 | M               | F               | M               |           |           |           |
| Donor BMI (kg/m <sup>2</sup> )                                       | 25.9      | 30.3              | 31.0            | 35.7            | 32.4            |           |           |           |
| Donor HbA <sub>1c</sub> or other measure of blood glucose control    | -         | 5.8               | -               | -               | -               |           |           |           |
| Origin/source of islets                                              | DRI       | IIDP              | IIDP            | IIDP            | IIDP            |           |           |           |
| Islet isolation center                                               | DRI       | Scharp-Lacy Inst. | Univ. Wisconsin | Univ. Wisconsin | Univ. Wisconsin |           |           |           |
| Donor history of diabetes? Please select yes/no from drop down list  | No        | No                | No              | No              | No              |           |           |           |
| If Yes, complete the next two lines if this information is available |           |                   |                 |                 |                 |           |           |           |
| Diabetes duration (years)                                            | -         | -                 | -               | -               | -               |           |           |           |
| Glucose-lowering therapy at time of death                            | -         | -                 | -               | -               | -               |           |           |           |
| <b>Recommended Information</b>                                       |           |                   |                 |                 |                 |           |           |           |
| Donor cause of death                                                 | Stroke    | Anoxia            | Anoxia          | CVA             | Head trauma     |           |           |           |
| Cold ischemia time (h)                                               | 14:38     | 11:09             | 12:30           | 08:09           | 06:14           |           |           |           |
| Estimated purity (%)                                                 | 90        | 85                | 95              | 94              | 86              |           |           |           |
| Estimated viability (%)                                              | 90        | 95                | 98              | 98              | 97              |           |           |           |
| Additional notes                                                     | -         | -                 | -               | -               | -               |           |           |           |

## 1.2 Supplementary Figures

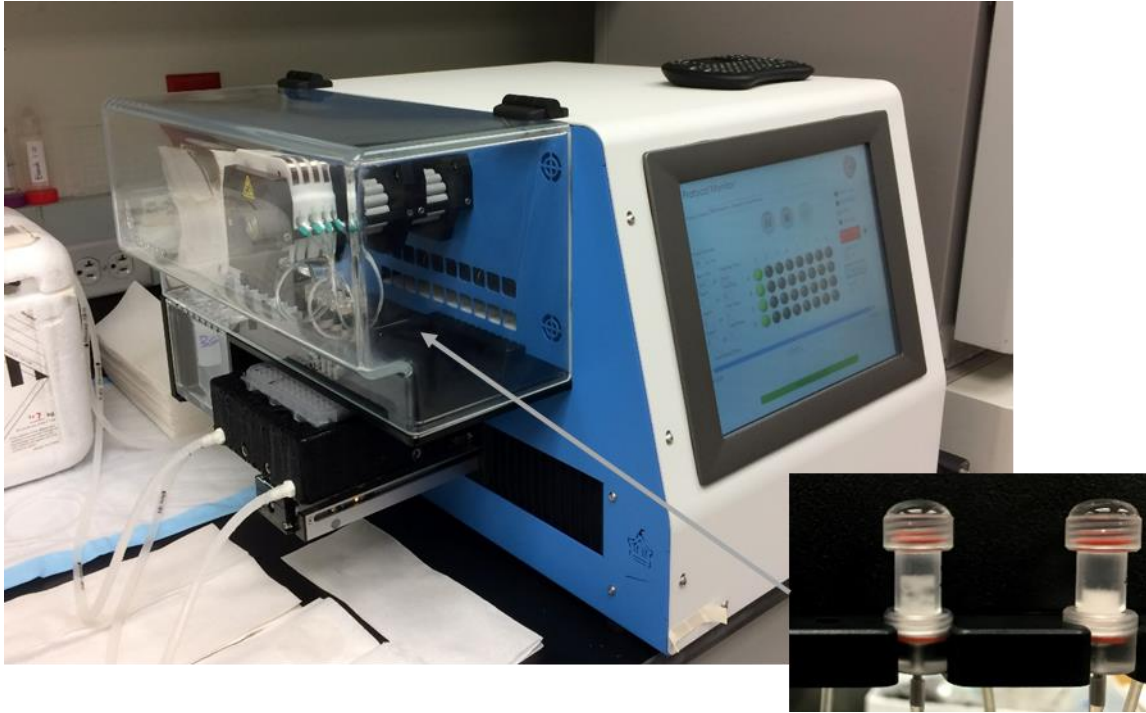

**Figure S1. The PERI-4.2 automated perfusion machine (Biorep Inc., Miami, FL, USA) used in the present study with islets in Perspex micro-columns embedded in Bio-Gel P-4 (acrylamide-based) microbead slurry. It allows the dynamic measurement of the glucose-stimulated insulin secretion (GSIS) from isolated islets providing more informative quality assessment than static GSIS/SI. This version has a software-controlled customizable input, multiple (4×3) channels in parallel with adjustable temporal resolution sample collection (e.g., every minute).**

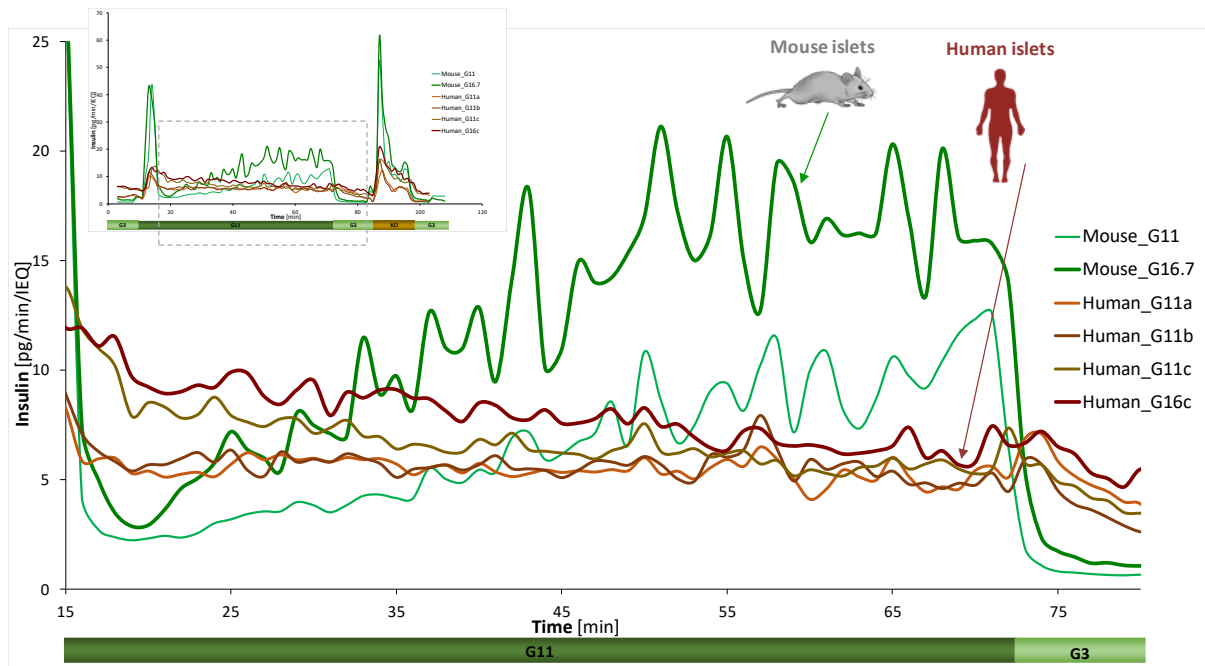

**Figure S2. Differences in the second phase insulin secretion of human and murine islets in dynamic GSIS.** Data collected for free murine and human islets perfused using a low (G3, 8 min) → high (G11 or G16.7, 60 min) → low (G3, 15 min) incoming glucose stimulation as shown. Data are from single perfusions with prolonged high glucose phase to highlight differences in the second phase of insulin secretion. Insert is secretion profile for the entire perfusion experiment.



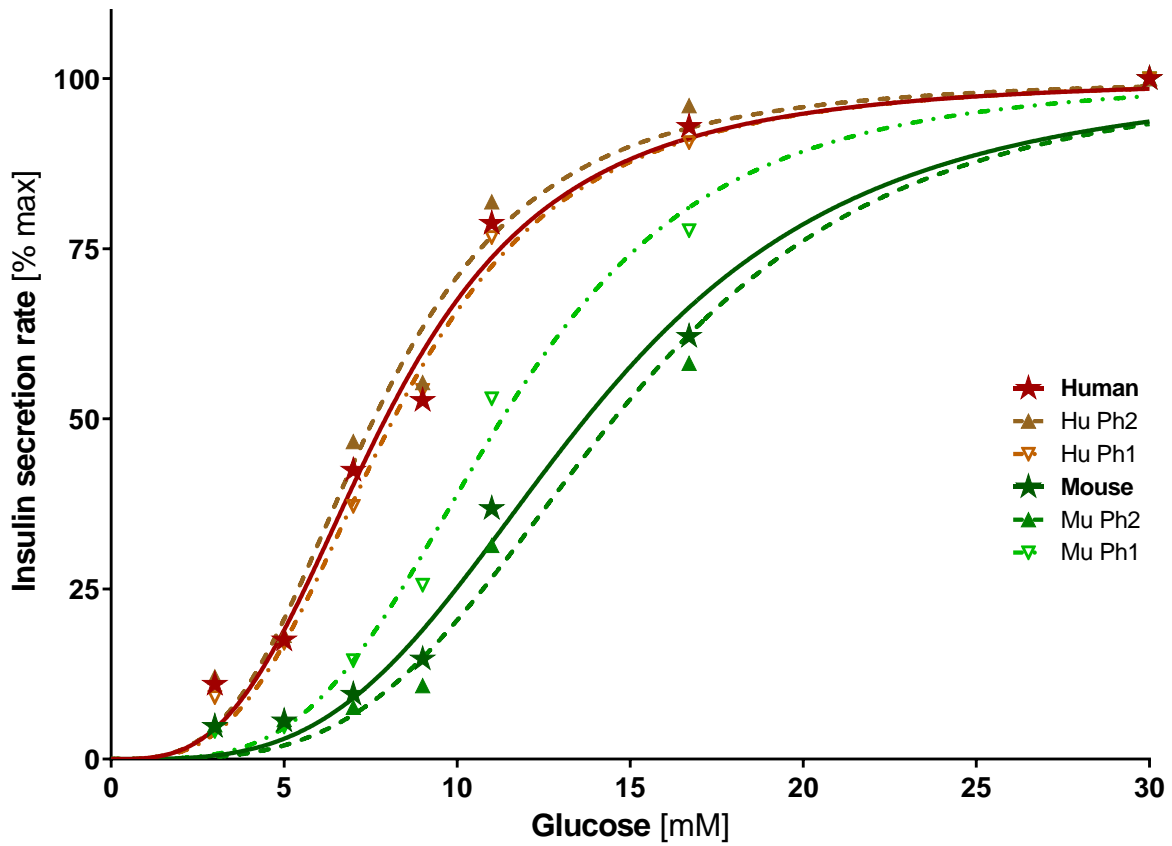

**Figure S3. Concentration-response of first and second phase insulin secretion.** Average, first-, and second phase insulin secretion rates of mouse and human islets at different glucose steps expressed as percent of maximum value (at G30) and fitted with sigmoidal dose response functions (Hill function, eq. 1).

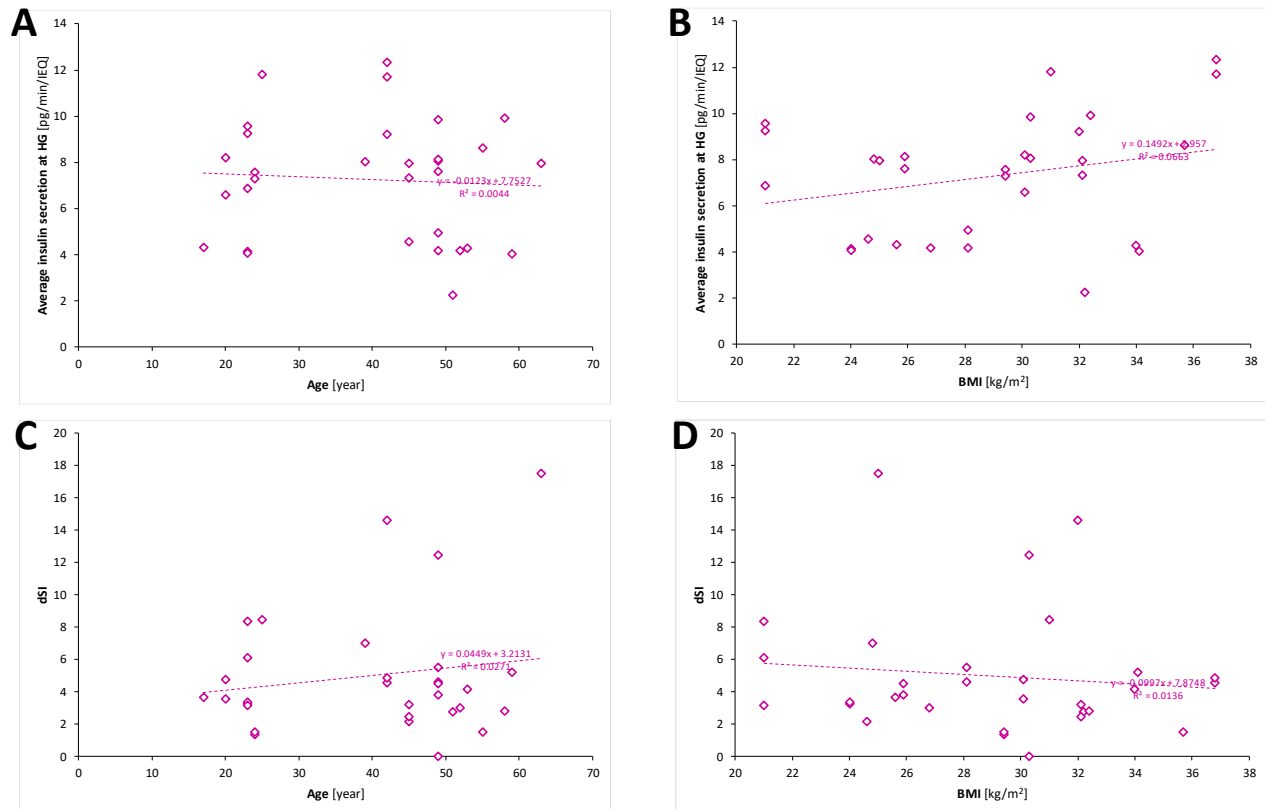

**Figure S4. Effect of donor characteristics on insulin secreting ability of human islets.** Average amount of insulin secreted at high glucose (G11) and corresponding dynamic stimulation index (dSI) as a function of donor age (**A**, **C**) and BMI (**B**, **D**) for the present dataset ( $n=34$ ). No significant effects were present as indicated by the slope and  $r^2$  values of the corresponding linear regressions.
